# Supplementary material
Source: Springer Nature journal article supplement (https://www.springermedizin.de/resource/supplementary/13054_2009_8364_MOESM1_ESM.pdf/9731798)

# ROC Curve

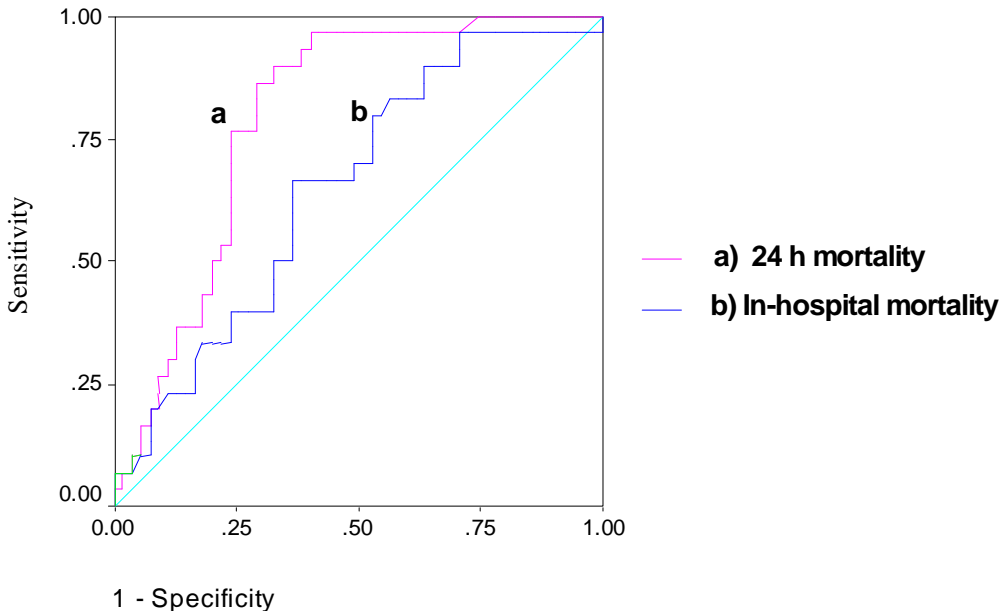

a) AUC:  $0.79 \pm 0.04$ ; CI 95% 0.70 to 0.89

b) AUC:  $0.65 \pm 0.06$ ; CI 95% 0.53 to 0.77

Supplement: MOESM1 [file 9731798]
